# Supplementary material for: Differential protein expression in tears of patients with primary open angle and pseudoexfoliative glaucoma
Source: Royal Society of Chemistry journal article supplement (doi:10.1039/c1mb05357d), 2011-11-29
Supplement: c1mb05357d.xlsx [file c1mb05357d.xlsx]

## Sheet: Foglio1
protein.name	protein.score	protein.MatchedPeptides	protein.seqCover(%)	peptide.modification	peptide.seq	peptide.seqStart	peptide.seqLength	peptide.MatchedProducts	peptide.score	precursor.z	precursor.mz
sp|P61626|LYSC_HUMAN Lysozyme C OS=Homo sapiens GN=LYZ PE=1 SV=1	1478.05	20	72.3		STDYGIFQINSR	68	12	40	247.33	2	700.846
				Carbamidomethyl+C(8);Carbamidomethyl+C(12);Carbamidomethyl+C(26)	TPGAVNACHLSCSALLQDNIADAVACAK	87	28	53	515.25	3	976.466
				Carbamidomethyl+C(9)	GISLANWMCLAK	39	12	37	262.67	2	682.351
					LGMDGYR	32	7	9	61.89	2	406.188
					WESGYNTR	51	8	13	88.07	2	506.728
				Carbamidomethyl+C(3)	YWCNDGK	80	7	18	92.59	2	471.691
				Carbamidomethyl+C(6)	QYVQGCGV	140	8	12	74.48	1	910.405
					VVRDPQGIR	116	9	22	169.83	2	520.304
					ATNYNAGDR	59	9	4	44.03	2	491.226
					AWVAWR	125	6	2	30.95	2	394.716
					DPQGIR	119	6	2	15.6	2	343.185
					RLGMDGYR	31	8	5	74.48	2	484.246
				Carbamidomethyl+C(3);Carbamidomethyl+C(15);Carbamidomethyl+C(19);Carbamidomethyl+C(33)	YWCNDGKTPGAVNACHLSCSALLQDNIADAVACAK	80	35	7	53.12	4	963.447
				Carbamidomethyl+C(9)	GISLANWMCLAKWESGYNTR	39	20	4	31.45	3	786.385
				Oxidation+M(3)	LGMDGYR	32	7	4	61.89	2	414.187
					VRDPQGIR	117	8	7	62.39	2	470.769
					RDPQGIR	118	7	1	10.33	2	421.234
					ESGYNTR	52	7	0	0.75	1	826.372
					WESGYNTR	51	8	0	0.75	2	498.217
					VVRDPQGIR	116	9	0	1	3	341.528
sp|P12273|PIP_HUMAN Prolactin-inducible protein OS=Homo sapiens GN=PIP PE=1 SV=1	1240.06	11	69.86		TVQIAAVVDVIR	106	12	28	262.67	2	642.393
				Carbamidomethyl+C(5)	ELGICPDDAAVIPIK	118	15	25	230.29	2	805.932
					FYTIEILK	136	8	16	123.54	2	513.798
					TYLISSIPLQGAFNYK	69	16	37	298.93	2	907.996
				Carbamidomethyl+C(4);Carbamidomethyl+C(6)	YTACLCDDNPK	85	11	16	165.56	2	678.787
					SVRPNDEVTAVLAVQTELK	44	19	25	201.17	3	690.384
					NFDIPK	38	6	6	76.99	2	367.196
					TFYWDFYTNR	96	10	4	59.63	2	706.827
					FYTIEILKVE	136	10	15	185.43	2	627.858
				Carbamidomethyl+C(5)	ELGICPDDAAVIPIKNNR	118	18	11	104.36	3	665.686
					AVVDVIR	111	7	0	1.75	1	771.48
sp|P25311|ZA2G_HUMAN Zinc-alpha-2-glycoprotein OS=Homo sapiens GN=AZGP1 PE=1 SV=2	1399.02	15	47.99		HVEDVPAFQALGSLNDLQFFR	39	21	40	351.87	3	801.745
					AGEVQEPELR	241	10	21	154.74	2	564.292
					YSLTYIYTGLSK	27	12	17	148.25	2	704.879
					YYYDGKDYIEFNK	136	13	10	86.31	3	573.265
				Carbamidomethyl+C(1)	CLAYDFYPGK	224	10	11	86.35	2	617.291
					EIPAWVPFDPAAQITK	149	16	17	130.67	2	891.984
					QDPPSVVVTSHQAPGEK	203	17	18	140.63	3	592.637
				Carbamidomethyl+C(7)	AYLEEECPATLR	179	12	12	143.47	2	726.354
					IDVHWTR	234	7	9	74.23	2	463.749
					SSGAFWK	129	7	7	58.88	2	391.697
				Carbamidomethyl+C(7)	AYLEEECPATLRK	179	13	9	86.31	3	527.266
					YYYDGKDYIEFNKEIPAWVPFDPAAQITK	136	29	9	45.55	4	871.188
					WEAEPVYVQR	167	10	5	59.63	2	638.828
					QKWEAEPVYVQR	165	12	20	193.5	3	511.599
					NILDRQDPPSVVVTSHQAPGEK	198	22	17	172.68	4	597.563
sp|O75556|SG2A1_HUMAN Mammaglobin-B OS=Homo sapiens GN=SCGB2A1 PE=1 SV=1	415.95	8	51.58		TINSDISIPEYK	31	12	27	213.62	2	690.361
					LLEDMVEK	23	8	13	108.19	2	488.755
				Carbamidomethyl+C(2)	QCFLNQSHR	63	9	22	102.42	2	595.284
					ELLQEFIDSDAAAEAMGK	43	18	30	268.64	2	969.475
				Carbamidomethyl+C(4)	FKQCFLNQSHR	61	11	4	32.77	3	488.91
				Oxidation+M(5)	LLEDMVEK	23	8	5	72.72	2	496.756
					FLNQSHR	65	7	1	10.33	2	451.238
				Carbamidomethyl+C(2)	QCFLNQSHR	63	9	0	1	3	391.514
sp|P01036|CYTS_HUMAN Cystatin-S OS=Homo sapiens GN=CST4 PE=1 SV=3	527.99	9	60.28	Carbamidomethyl+C(8)	SQPNLDTCAFHEQPELQKK	96	19	14	83.46	4	568.276
					ALHFAISEYNK	46	11	19	185.68	2	646.843
				Carbamidomethyl+C(8)	SQPNLDTCAFHEQPELQK	96	18	10	45.63	3	714.674
					RPLQVLR	65	7	13	107.94	2	441.285
					ATEDEYYR	57	8	12	77.49	2	523.727
					MSLVNSR	130	7	9	61.89	2	403.715
					IIPGGIYDADLNDEWVQR	28	18	6	60.19	2	1037.53
				Carbamidomethyl+C(3)	QLCSFEIYEVPWEDR	115	15	17	163.67	2	985.964
				Carbamidomethyl+C(4)	KQLCSFEIYEVPWEDR	114	16	6	43.72	3	700.343
sp|P31025|LCN1_HUMAN Lipocalin-1 OS=Homo sapiens GN=LCN1 PE=1 SV=1	1246.08	20	60.23		NNLEALEDFEK	139	11	31	201.03	2	661.323
					GLSTESILIPR	155	11	30	216.38	2	593.35
				Carbamidomethyl+C(7)	DHYIFYCEGELHGKPVR	112	17	28	293.74	4	530.751
					AMTVDREFPEMNLESVTPMTLTTLEGGNLEAK	38	32	38	340.03	3	1175.58
					EFPEMNLESVTPMTLTTLEGGNLEAK	44	26	17	117.87	3	951.14
					VTMLISGR	70	8	7	88.07	2	438.755
					HVAYIIR	101	7	4	61.89	1	871.518
					AVLEK	83	5	1	15.35	1	559.35
					NNLEALEDFEKAAGAR	139	16	11	93.58	3	583.295
				Carbamidomethyl+C(11)	SHVKDHYIFYCEGELHGKPVR	108	21	4	33.42	5	515.054
					AVLEKTDEPGK	83	11	3	36.75	2	593.825
				Oxidation+M(3)	VTMLISGR	70	8	10	105.18	2	446.749
				Carbamidomethyl+C(1)	CEGELHGKPVR	118	11	4	29.5	2	641.329
					EGELHGKPVR	119	10	3	23.28	2	561.313
					GELHGKPVR	120	9	4	29.5	2	496.79
				Carbamidomethyl+C(2)	YCEGELHGKPVR	117	12	1	7.56	3	482.239
					TESILIPR	158	8	3	25.21	1	928.545
					EALEDFEK	142	8	0	1.5	1	980.46
					LHGKPVR	122	7	0	3	2	403.756
					LEALEDFEK	141	9	1	9.07	1	1093.55
sp|P01037|CYTN_HUMAN Cystatin-SN OS=Homo sapiens GN=CST1 PE=1 SV=3	352.53	6	44.68	Carbamidomethyl+C(8)	SQPNLDTCAFHEQPELQKK	96	19	14	83.46	4	568.276
					ALHFAISEYNK	46	11	19	185.68	2	646.843
				Carbamidomethyl+C(8)	SQPNLDTCAFHEQPELQK	96	18	10	45.63	3	714.674
				Carbamidomethyl+C(3)	QLCSFEIYEVPWENRR	115	16	10	59.28	3	709.348
					QQTVGGVNYFFDVEVGR	74	17	4	29.5	2	957.982
					ALHFAISEYNK	46	11	0	1.5	3	425.555
sp|P26447|S10A4_HUMAN Protein S100-A4 OS=Homo sapiens GN=S100A4 PE=1 SV=1	221	3	26.73		ALDVMVSTFHK	7	11	10	98.94	3	416.552
					ELPSFLGK	40	8	7	62.14	2	445.756
					TDEAAFQK	49	8	8	77.49	2	455.224
sp|Q16378|PROL4_HUMAN Proline-rich protein 4 OS=Homo sapiens GN=PRR4 PE=1 SV=3	496.05	8	29.1		HPPPPPFQNQQRPPR	81	15	17	99.15	3	598.315
					HPQEQPLW	126	8	18	108.19	2	517.759
					FPSVSLQEASSFFQR	106	15	37	250.41	2	865.436
					HPPPPPFQNQQRPPRR	81	16	5	54.61	3	650.354
					HPPPPPFQ	81	8	0	2.5	2	458.733
					PPPPPFQNQQRPPR	82	14	0	2.5	3	552.635
					PPPPPFQNQQRPPRR	82	15	2	23.45	3	604.669
					FPSVSLQEASSFFQR	106	15	0	2.5	3	571.286
sp|P01876|IGHA1_HUMAN Ig alpha-1 chain C region OS=Homo sapiens GN=IGHA1 PE=1 SV=2	1083.23	13	45.61		WLQGSQELPR	263	10	24	154.74	2	607.324
					TPLTATLSK	212	9	20	120.78	2	466.276
					QEPSQGTTTFAVTSILR	282	17	30	217.57	2	918.484
					YLTWASR	275	7	16	74.23	2	448.733
				Carbamidomethyl+C(4)	TFTCTAAYPESK	200	12	18	141.43	2	688.318
				Carbamidomethyl+C(3);Carbamidomethyl+C(5);Carbamidomethyl+C(15)	DLCGCYSVSSVLPGCAEPWNHGK	177	23	19	181.12	3	865.053
					VAAEDWK	299	7	12	95.6	2	409.704
					SAVQGPPER	168	9	14	103.67	2	470.745
				Carbamidomethyl+C(29)	SGNTFRPEVHLLPPPSEELALNELVTLTCLAR	221	32	10	64.5	4	894.227
				Carbamidomethyl+C(6)	GDTFSCMVGHEALPLAFTQK	307	20	4	18.44	3	737.026
					DASGVTFTWTPSSGK	153	15	20	184.55	2	770.877
					VQGPPER	170	7	1	10.33	2	391.713
					LTATLSK	214	7	2	26.93	1	733.448
sp|P09228|CYTT_HUMAN Cystatin-SA OS=Homo sapiens GN=CST2 PE=1 SV=1	250.97	7	34.75	Carbamidomethyl+C(8)	SQPNLDTCAFHEQPELQKK	96	19	14	83.46	4	568.276
				Carbamidomethyl+C(8)	SQPNLDTCAFHEQPELQK	96	18	10	45.63	3	714.674
					ATEDEYYR	57	8	12	77.49	2	523.727
					MSLVNSR	130	7	9	61.89	2	403.715
					IIEGGIYDADLNDER	28	15	3	22.98	2	846.911
				Carbamidomethyl+C(6)	PNLDTCAFHEQPELQKK	98	17	4	23.06	3	685.676
				Carbamidomethyl+C(8)	SQPNLDTCAFHEQPELQKK	96	19	0	3.5	4	564.025
sp|P01860|IGHG3_HUMAN Ig gamma-3 chain C region OS=Homo sapiens GN=IGHG3 PE=1 SV=2	261.59	7	20.69		VVSVLTVLHQDWLNGK	231	16	20	141.05	3	603.341
				Carbamidomethyl+C(7)	NQVSLTCLVK	290	10	14	100.91	2	581.325
				Carbamidomethyl+C(11)	STSGGTAALGCLVK	16	14	3	32.06	2	661.353
					EEMTK	285	5	1	15.35	1	637.289
				Carbamidomethyl+C(6)	TPEVTCVVVDVSHEDPEVQFK	185	21	5	33.42	3	805.392
				Carbamidomethyl+C(10);Carbamidomethyl+C(23)	GPSVFPLAPCSRSTSGGTAALGCLVK	4	26	7	50.11	4	648.328
					VVSVLTVLHQDWLNGK	231	16	0	2.75	3	597.341
sp|Q9GZZ8|LACRT_HUMAN Extracellular glycoprotein lacritin OS=Homo sapiens GN=LACRT PE=1 SV=1	716.43	9	28.26		SILLTEQALAK	90	11	39	231.73	2	593.86
					QFIENGSEFAQK	114	12	47	250.34	2	699.344
					FSLLKPWA	130	8	18	154.24	2	481.279
					QELNPLK	78	7	20	107.94	2	421.239
					KFSLLKPWA	129	9	12	154.49	2	545.328
					LLTEQALAK	92	9	12	75.23	2	493.802
					SLLKPWA	131	7	6	62.14	1	814.487
					TEQALAK	94	7	4	22.2	1	760.425
					LTEQALAK	93	8	6	36.75	1	873.507
sp|Q96DA0|ZG16B_HUMAN Zymogen granule protein 16 homolog B OS=Homo sapiens GN=ZG16B PE=1 SV=3	157.53	5	29.81		YFSTTEDYDHEITGLR	62	16	8	68.19	3	649.637
					VSVGLLLVK	78	9	7	93.09	2	464.319
					VFVAFQAFLR	121	10	6	82.55	2	599.351
					YFYFGK	141	6	2	33.96	2	412.705
					LGALGGNTQEVTLQPGEYITK	100	21	7	56.96	2	1095.09
sp|P01859|IGHG2_HUMAN Ig gamma-2 chain C region OS=Homo sapiens GN=IGHG2 PE=1 SV=2	183.8	3	11.96	Carbamidomethyl+C(7)	NQVSLTCLVK	239	10	14	100.91	2	581.325
					VVSVLTVVHQDWLNGK	180	16	10	62.96	3	598.672
					TKPREEQFNSTFR	167	13	4	39.59	2	820.408
sp|P17931|LEG3_HUMAN Galectin-3 OS=Homo sapiens GN=LGALS3 PE=1 SV=5	184.24	5	17.6		IALDFQR	144	7	5	61.89	2	431.738
					IQVLVEPDHFK	199	11	5	41.52	3	442.248
					MLITILGTVKPNANR	129	15	6	64.84	3	547.66
					GNDVAFHFNPR	151	11	4	36.75	3	425.209
					AFHFNPR	155	7	0	1.5	2	444.73
sp|P02787|TRFE_HUMAN Serotransferrin OS=Homo sapiens GN=TF PE=1 SV=3	243.88	9	13.61	Carbamidomethyl+C(10)	DLLFRDDTVCLAK	646	13	5	53.39	3	522.605
				Carbamidomethyl+C(2)	WCAVSEHEATK	26	11	5	44.32	3	439.867
				Carbamidomethyl+C(13)	SAGWNIPIGLLYCDLPEPR	143	19	11	83.35	3	724.373
					EDPQTFYYAVAVVK	107	14	3	24.28	2	815.425
					HSTIFENLANK	225	11	5	41.52	2	637.337
					EFQLFSSPHGK	299	11	6	62.68	3	426.215
					KPLEK	162	5	1	15.35	1	614.387
				Carbamidomethyl+C(5)	DDTVCLAK	651	8	6	57.37	2	461.221
				Carbamidomethyl+C(6)	DYELLCLDGTR	576	11	3	36.75	2	677.808
sp|Q99935|PROL1_HUMAN Proline-rich protein 1 OS=Homo sapiens GN=PROL1 PE=1 SV=2	164.55	11	31.85		LFPGYPNLHFPLRPYYVGPIR	97	21	10	93.51	4	629.844
					RPYLPGQLPPPPLYRPR	26	17	8	67.03	3	673.06
					LNSPLSLPFVPGR	56	13	8	84.05	2	698.909
					FSQAVILSQLFPLESIR	77	17	18	200.69	2	974.562
					LFAIFG	242	6	3	45.68	1	667.386
					SFWQK	237	5	2	30.28	2	348.178
					PPPPLYRPR	34	9	0	3.14	2	546.825
					PGYPNLHFPLRPYYVGPIR	99	19	6	51.69	4	564.806
					LPPPPLYRPR	33	10	0	3.14	2	603.367
					PPPLYRPR	35	8	0	3.14	2	498.298
					PGQLPPPPLYRPR	30	13	2	16.02	3	496.619
sp|A6NMY6|AXA2L_HUMAN Putative annexin A2-like protein OS=Homo sapiens GN=ANXA2P2 PE=5 SV=2	173.02	3	15.04		SALSGHLETVILGLLK	88	16	12	118.64	3	550.997
					LSLEGDHSTPPSAYGSVK	10	18	5	32.69	3	615.64
					IQNKPLYFADQLYDSMK	262	17	3	27.97	2	1037.53
sp|O43790|KRT86_HUMAN Keratin	246.59	7	19.75		FAAFIDK	116	7	9	72.37	2	406.224
					ATAENEFVALKK	201	12	13	121.64	3	440.914
					LASELNHVQEVLEGYKK	175	17	6	26.96	3	653.025
					ATVIR	305	5	1	14.97	1	559.355
				Carbamidomethyl+C(5);Carbamidomethyl+C(9)	GGVVCGDLCASTTAPVVSTR	432	20	4	17.63	4	502.492
					MIQRLTAEVENAK	327	13	3	24.83	2	751.9
				Carbamidomethyl+C(21)	LEAAVAQSEQQGEAALSDARCK	345	22	4	22.91	3	778.046
sp|P00352|AL1A1_HUMAN Retinal dehydrogenase 1 OS=Homo sapiens GN=ALDH1A1 PE=1 SV=2	290.56	16	36.53	Carbamidomethyl+C(7)	IGPALSCGNTVVVKPAEQTPLTALHVASLIK	179	31	9	45.07	4	796.955
					ELGEYGFHEYTEVK	476	14	5	51.61	3	567.604
					VAFTGSTEVGK	241	11	3	41.49	2	548.294
				Carbamidomethyl+C(7)	HEPIGVCGQIIPWNFPLVMLIWK	156	23	8	51.96	3	916.498
					LADLIER	91	7	4	46.51	2	415.246
					SLDDVIKR	412	8	5	57.32	2	473.277
					EAGFPPGVVNIVPGYGPTAGAAISSHMDIDK	210	31	4	13.6	4	767.644
					SVER	322	4	2	30.42	1	490.263
					TIPIDGNFFTYTR	143	13	3	35	2	772.902
					IFVEESIYDEFVR	308	13	3	40.23	2	823.422
				Carbamidomethyl+C(13)	LYSNAYLNDLAGCIK	113	15	3	22.95	2	857.94
					ILDLIESGK	353	9	3	36.22	2	494.296
					LLYK	87	4	1	15.08	1	536.349
				Phosphoryl STY(5)	SSSGTPDLPVLLTDLK	1	16	3	29.52	3	574.956
				Oxidation+M(27)	EAGFPPGVVNIVPGYGPTAGAAISSHMDIDK	210	31	3	13.6	4	771.631
					ELGEYGFHEYTEVK	476	14	0	2.26	3	561.599
sp|P00558|PGK1_HUMAN Phosphoglycerate kinase 1 OS=Homo sapiens GN=PGK1 PE=1 SV=3	139.87	8	23.5		ALESPERPFLAILGGAK	199	17	7	61.97	3	590.34
					LGDVYVNDAFGTAHR	156	15	6	36.36	3	545.607
				Carbamidomethyl+C(2)	FCLDNGAK	48	8	4	38.98	2	462.719
					SVVLMSHLGRPDGVPMPDK	56	19	3	19.13	3	679.019
					FDENAK	291	6	1	15.59	1	723.335
					IQLINNMLDK	220	10	5	32.49	2	601.329
					YSLEPVAVELK	75	11	3	32.74	2	624.358
					ITLPVDFVTADKFDENAK	279	18	4	45.06	3	675.022
sp|P01591|IGJ_HUMAN Immunoglobulin J chain OS=Homo sapiens GN=IGJ PE=1 SV=4	162.35	6	35.22	Carbamidomethyl+C(9)	FVYHLSDLCK	82	10	9	98.34	3	427.881
					IVLVDNK	27	7	7	60.41	2	400.752
				Carbamidomethyl+C(1)	CYTAVVPLVYGGETK	130	15	11	115.38	2	828.932
					IIVPLNNR	61	8	3	37.93	2	469.801
				Carbamidomethyl+C(9)	FVYHLSDLCKK	82	11	3	40.51	3	470.578
					IIRSSEDPNEDIVER	43	15	4	35.11	2	886.453
sp|P01833|PIGR_HUMAN Polymeric immunoglobulin receptor OS=Homo sapiens GN=PIGR PE=1 SV=4	1177.7	25	43.85		NADLQVLKPEPELVYEDLR	231	19	36	307.51	3	747.736
				Carbamidomethyl+C(7)	GSVTFHCALGPEVANVAK	250	18	16	144.37	3	619.654
					ILLNPQDKDGSFSVVITGLR	296	20	26	245.4	3	724.747
				Carbamidomethyl+C(9)	LSDAGQYLCQAGDDSNSNKK	211	20	13	114	3	724.334
				Carbamidomethyl+C(6)	TVTINCPFK	146	9	10	69.9	2	540.288
				Carbamidomethyl+C(1)	CGLGINSR	109	8	11	70.88	2	438.725
					LDIQGTGQLLFSVVINQLR	192	19	17	159.59	3	705.41
					LVSLTLNLVTR	525	11	8	42.93	2	614.89
					VLDSGFR	585	7	5	45.44	2	397.217
				Carbamidomethyl+C(1)	CPLLVDSEGWVK	394	12	10	140.78	2	701.865
				Carbamidomethyl+C(8)	ADEGWYWCGVK	536	11	11	158.48	2	685.804
				Carbamidomethyl+C(7)	QSSGENCDVVVNTLGK	272	16	8	111.94	2	853.917
				Carbamidomethyl+C(3)	YLCGAHSDGQLQEGSPIQAWQLFVNEESTIPR	322	32	19	168.39	3	1210.93
					VYTVDLGR	138	8	7	85.84	2	461.76
				Carbamidomethyl+C(5)	AFVNCDENSR	515	10	6	66.19	2	606.269
					ILLNPQDK	296	8	7	87.6	2	470.784
					GLSFDVSLEVSQGPGLLNDTK	117	21	5	26.66	4	544.791
					LFAEEK	603	6	1	15.24	2	368.702
				Carbamidomethyl+C(26)	NADLQVLKPEPELVYEDLRGSVTFHCALGPEVANVAK	231	37	9	44.29	5	816.627
					IIEGEPNLKVPGNVTAVLGETLK	456	23	3	15.92	2	1196.18
				Carbamidomethyl+C(7);Carbamidomethyl+C(21)	GSVTFHCALGPEVANVAKFLCR	250	22	3	26.31	3	811.74
					ANLTNFPENGTFVVNIAQLSQDDSGRYK	81	28	4	13.91	3	1033.51
				Carbamidomethyl+C(21)	SPIFGPEEVNSVEGNSVSITCYYPPTSVNRHTR	19	33	5	42.72	3	1231.91
				Phosphoryl STY(8)	AAGSRDVSLAK	566	11	5	41.5	2	577.777
				Phosphoryl STY(11)	GLSFDVSLEVSQGPGLLNDTK	117	21	3	17.01	3	752.686
sp|P01834|IGKC_HUMAN Ig kappa chain C region OS=Homo sapiens GN=IGKC PE=1 SV=1	682.94	6	83.02	Carbamidomethyl+C(8)	SGTASVVCLLNNFYPR	18	16	34	332.26	2	899.461
				Carbamidomethyl+C(4)	VYACEVTHQGLSSPVTK	82	17	29	284.81	3	625.984
					TVAAPSVFIFPPSDEQLK	0	18	5	44.01	2	973.534
					VDNALQSGNSQESVTEQDSKDSTYSLSSTLTLSK	41	34	5	39.64	4	905.686
				Carbamidomethyl+C(8)	SGTASVVCLLNNFYPREAK	18	19	3	18.33	3	709.361
				Carbamidomethyl+C(8)	SGTASVVCLLNNFYPR	18	16	0	3	3	594.299
sp|P01857|IGHG1_HUMAN Ig gamma-1 chain C region OS=Homo sapiens GN=IGHG1 PE=1 SV=1	868.07	13	54.55		VVSVLTVLHQDWLNGK	184	16	27	187.23	3	603.338
				Carbamidomethyl+C(7)	NQVSLTCLVK	243	10	23	168.76	2	581.32
					FNWYVDGVEVHNAK	157	14	20	185.76	3	559.938
				Carbamidomethyl+C(4);Carbamidomethyl+C(7)	THTCPPCPAPELLGGPSVFLFPPKPK	105	26	10	49.4	4	711.87
				Carbamidomethyl+C(6)	TPEVTCVVVDVSHEDPEVK	138	19	20	159.8	3	713.684
				Carbamidomethyl+C(11)	STSGGTAALGCLVK	16	14	10	69.35	2	661.35
				Carbamidomethyl+C(9)	WQQGNVFSCSVMHEALHNHYTQK	299	23	8	35.61	4	701.075
					ALPAPIEK	209	8	7	38.66	2	419.756
					GFYPSDIAVEWESNGQPENNYK	253	22	5	16.95	3	848.723
					EPQVYTLPPSR	227	11	4	29.43	2	643.842
					TTPPVLDSDGSFFLYSK	275	17	5	49.25	2	937.478
				Phosphoryl STY(4)	EEQYNSTYR	175	9	5	35.91	3	423.83
					WYVDGVEVHNAK	159	12	1	8	2	708.854
sp|P01861|IGHG4_HUMAN Ig gamma-4 chain C region OS=Homo sapiens GN=IGHG4 PE=1 SV=1	471.57	8	26.3		VVSVLTVLHQDWLNGK	181	16	27	187.23	3	603.338
				Carbamidomethyl+C(7)	NQVSLTCLVK	240	10	23	168.76	2	581.32
				Carbamidomethyl+C(10)	GPSVFPLAPCSR	4	12	5	51.91	2	644.336
					GFYPSDIAVEWESNGQPENNYK	250	22	5	16.95	3	848.723
					EEQFNSTYR	172	9	4	60.68	2	587.26
					TTPPVLDSDGSFFLYSR	272	17	3	20.56	2	951.481
					TVLHQDWLNGK	186	11	7	79.4	2	655.844
					VVSVLTVLHQDWLNGK	181	16	0	2.83	3	597.339
sp|P01871|IGHM_HUMAN Ig mu chain C region OS=Homo sapiens GN=IGHM PE=1 SV=3	115.36	8	22.57		GVALHRPDVYLLPPAR	322	16	6	37.75	3	592.013
					VTSTLTIK	177	8	4	46.91	2	431.77
				Carbamidomethyl+C(24)	YAATSQVLLPSKDVMQGTDEHVVCK	64	25	7	24.39	4	694.852
				Carbamidomethyl+C(3)	FTCTVTHTDLPSPLK	300	15	3	31.17	3	572.961
				Carbamidomethyl+C(3)	LICQATGFSPR	131	11	4	55.27	2	625.329
					YAATSQVLLPSK	64	12	5	57.89	2	639.366
					QVGSGVTTDQVQAEAK	153	16	5	31.22	2	809.421
					YKNNSDISSTR	43	11	4	43.05	2	642.81
sp|P01877|IGHA2_HUMAN Ig alpha-2 chain C region OS=Homo sapiens GN=IGHA2 PE=1 SV=3	823.57	12	50		WLQGSQELPR	250	10	27	180.96	2	607.326
					YLTWASR	262	7	12	60.41	2	448.736
					VAAEDWK	286	7	11	72.37	2	409.706
				Carbamidomethyl+C(13);Carbamidomethyl+C(21);Carbamidomethyl+C(22)	HYTNPSQDVTVPCPVPPPPPCCHPR	88	25	20	157.19	4	728.095
				Carbamidomethyl+C(29)	SGNTFRPEVHLLPPPSEELALNELVTLTCLAR	208	32	26	235.3	4	894.228
				Carbamidomethyl+C(3);Carbamidomethyl+C(5);Carbamidomethyl+C(15);Carbamidomethyl+C(27)	DLCGCYSVSSVLPGCAQPWNHGETFTCTAAHPELK	164	35	10	41.71	4	988.199
					SAVQGPPER	155	9	13	116.05	2	470.749
				Carbamidomethyl+C(21)	MAGKPTHVNVSVVMAEVDGTCY	318	22	3	22.95	4	592.024
				Carbamidomethyl+C(7)	KGDTFSCMVGHEALPLAFTQK	293	21	18	199.01	3	779.724
					EKYLTWASR	260	9	3	42.98	2	577.306
					VQGPPER	157	7	2	10.04	2	391.715
				Carbamidomethyl+C(4);Carbamidomethyl+C(12);Carbamidomethyl+C(13)	TVPCPVPPPPPCCHPR	97	16	1	7.41	2	934.445
sp|P01877|IGHA2_HUMAN Ig alpha-2 chain C region OS=Homo sapiens GN=IGHA2 PE=1 SV=3	689.58	12	45		WLQGSQELPR	250	10	28	188.28	2	607.323
					QEPSQGTTTFAVTSILR	269	17	28	206.01	2	918.484
					YLTWASR	262	7	12	74.17	2	448.733
					VAAEDWK	286	7	10	74.17	2	409.704
					SAVQGPPER	155	9	12	88.24	2	470.746
				Carbamidomethyl+C(3);Carbamidomethyl+C(5);Carbamidomethyl+C(15);Carbamidomethyl+C(27)	DLCGCYSVSSVLPGCAQPWNHGETFTCTAAHPELK	164	35	13	72.98	4	988.196
					WLQGSQELPREK	250	12	3	27.55	3	490.924
				Carbamidomethyl+C(13);Carbamidomethyl+C(21);Carbamidomethyl+C(22)	HYTNPSQDVTVPCPVPPPPPCCHPR	88	25	19	177.02	4	728.09
					DASGATFTWTPSSGK	140	15	10	102.53	2	756.862
				Carbamidomethyl+C(6)	GDTFSCMVGHEALPLAFTQK	294	20	3	18.41	3	737.027
					DVLVR	245	5	1	15.33	1	601.37
				Carbamidomethyl+C(7)	KGDTFSCMVGHEALPLAFTQK	293	21	29	325.71	4	585.036
sp|P02652|APOA2_HUMAN Apolipoprotein A-II OS=Homo sapiens GN=APOA2 PE=1 SV=1	129.4	2	31		AGTELVNFLSYFVELGTQPATQ	78	22	13	81.01	3	795.744
					SPELQAEAK	53	9	4	35.91	2	486.757
sp|P02763|A1AG1_HUMAN Alpha-1-acid glycoprotein 1 OS=Homo sapiens GN=ORM1 PE=1 SV=1	105.37	5	27.86		YVGGQEHFAHLLILR	108	15	6	48.97	3	584.993
					SDVVYTDWKK	170	10	5	34.25	3	414.213
				Carbamidomethyl+C(4)	QDQCIYNTTYLNVQRENGTISR	86	22	4	27.04	4	669.068
					WFYIASAFR	42	9	7	93.01	2	580.806
					GGQEHFAHLLILR	110	13	1	7.84	3	497.614
sp|P02788|TRFL_HUMAN Lactotransferrin OS=Homo sapiens GN=LTF PE=1 SV=6	1700.38	42	57.32	Carbamidomethyl+C(8)	LADFALLCLDGK	586	12	21	223.39	2	668.359
				Carbamidomethyl+C(11)	SQQSSDPDPNCVDRPVEGYLAVAVVR	435	26	22	179.81	3	953.472
					YYGYTGAFR	543	9	11	99.83	2	549.262
					YLGPQYVAGITNLKK	680	15	24	210.99	3	555.652
				Carbamidomethyl+C(4)	VVWCAVGEQELR	363	12	22	196.47	2	723.372
				Carbamidomethyl+C(1);Carbamidomethyl+C(10)	CSTSPLLEACEFLRK	695	15	17	124.87	3	604.302
					SVNGKEDAIWNLLR	277	14	16	138.89	3	538.96
				Carbamidomethyl+C(2)	SCHLAMAPNHAVVSR	606	15	17	174.06	3	550.611
				Carbamidomethyl+C(4)	VVWCAVGEQELRK	363	13	13	121.91	3	525.279
					EDAIWNLLR	282	9	17	117.81	2	565.31
				Carbamidomethyl+C(8)	LADFALLCLDGKR	586	13	5	24.83	3	497.942
				Carbamidomethyl+C(4)	FKDCHLAR	260	8	8	85.84	3	349.512
					QVLLHQQAK	629	9	6	63.97	2	532.818
				Carbamidomethyl+C(1)	CGLVPVLAENYK	423	12	20	223.39	2	681.867
				Carbamidomethyl+C(10)	NLLFNDNTECLAR	658	13	30	274.58	2	790.391
				Carbamidomethyl+C(1)	CLAENAGDVAFVK	552	13	26	274.58	2	697.352
				Carbamidomethyl+C(1);Carbamidomethyl+C(10)	CSTSPLLEACEFLR	695	14	20	213.94	2	841.908
				Carbamidomethyl+C(9)	FDEYFSQSCAPGSDPR	503	16	14	146.36	2	931.902
				Carbamidomethyl+C(4);Carbamidomethyl+C(7)	SNLCALCIGDEQGENK	519	16	18	204.94	2	904.413
					LRPVAAEVYGTER	92	13	12	148.24	2	730.909
					FQLFGSPSGQK	304	11	14	112.33	2	598.316
					IDSGLYLGSGYFTAIQNLR	332	19	26	290.78	2	1044.56
					YLGPQYVAGITNLK	680	14	12	144.53	2	768.934
					DGAGDVAFIR	219	10	11	128.28	2	510.765
					SDTSLTWNSVK	462	11	8	83.65	2	619.315
					THYYAVAVVK	108	10	16	195.92	2	575.824
				Carbamidomethyl+C(6)	FFSASCVPGADK	170	12	8	78.48	2	643.308
					GGSFQLNELQGLK	119	13	13	113.07	2	695.881
					DSAIGFSR	320	8	7	70.88	2	426.721
					DLLFK	315	5	3	44.9	1	635.377
				Carbamidomethyl+C(6)	DSPIQCIQAIAENR	58	14	4	23.34	2	807.893
				Carbamidomethyl+C(18)	TAGWNIPMGLLFNQTGSCK	484	19	6	36.3	2	1048.01
				Carbamidomethyl+C(5);Carbamidomethyl+C(10)	NGSDCPDKFCLFQSETK	641	17	15	171.48	3	678.302
					KGGSFQLNELQGLK	118	14	23	234.13	3	506.949
					LKQVLLHQQAK	627	11	5	55.67	3	435.936
					FQLFGSPSGQKDLLFK	304	16	3	20.95	3	604.668
					LRPVAAEVYGTERQPR	92	16	7	71.71	3	614.677
					SDTSLTWNSVKGK	462	13	4	34.07	3	474.91
					DVTVLQNTDGNNNEAWAKDLK	565	21	4	17.01	2	1173.06
					LHGKTTYEK	671	9	3	42.98	2	538.793
				Carbamidomethyl+C(2);Oxidation+M(6)	SCHLAMAPNHAVVSR	606	15	11	124.11	3	555.942
					GKEDAIWNLLR	280	11	1	7.88	2	657.868
sp|Q86W24|NAL14_HUMAN NACHT	185.8	6	6.04		GSDIGDNGVK	737	10	10	62.36	2	481.233
					TSLPTNTWDGDR	645	12	3	27.55	3	454.88
					GIWTMTYVFYRENLR	433	15	5	31.03	3	650.336
					NLMHLDLK	729	8	4	62.09	2	492.271
					VFSSLK	351	6	1	15.59	1	680.401
				Carbamidomethyl+C(3);Carbamidomethyl+C(11)	ILCDALRYPNCNIQR	975	15	4	28.97	3	635.985
sp|Q06830|PRDX1_HUMAN Peroxiredoxin-1 OS=Homo sapiens GN=PRDX1 PE=1 SV=1	431.62	9	54.77	Carbamidomethyl+C(5)	HGEVCPAGWKPGSDTIKPDVQK	168	22	13	81.84	4	602.3
					LVQAFQFTDK	158	10	10	70.42	2	598.825
					QITVNDLPVGR	140	11	11	95.9	2	606.347
				Carbamidomethyl+C(3);Carbamidomethyl+C(15)	LNCQVIGASVDSHFCHLAWVNTPK	68	24	8	40.69	4	689.09
					ADEGISFR	120	8	7	64.68	2	447.724
					GLFIIDDK	128	8	7	76.89	2	460.762
					ATAVMPDGQFK	16	11	4	43.87	2	582.795
					IGHPAPNFK	7	9	4	52.9	3	327.513
					SSGNAKIGHPAPNFK	1	15	3	30.76	3	508.933
sp|Q04828|AK1C1_HUMAN Aldo-keto reductase family 1 member C1 OS=Homo sapiens GN=AKR1C1 PE=1 SV=1	114.75	4	17.96		TPALIALR	250	8	5	62.09	2	427.781
					LNDGHFMPVLGFGTYAPAEVPK	9	22	6	17.17	3	787.402
					HIDSAHLYNNEEQVGLAIR	47	19	3	19.13	3	727.034
					SIGVSNFNR	161	9	5	52.8	1	993.518
sp|P62258|1433E_HUMAN 14-3-3 protein epsilon OS=Homo sapiens GN=YWHAE PE=1 SV=1	214.08	4	15.69		NLLSVAYK	42	8	12	87.47	2	454.268
					DSTLIMQLLR	215	10	11	118.47	2	595.34
					LAKAAFDDAIAELDTLSEESYK	193	22	3	16.99	3	800.729
				Oxidation+M(4)	VAGMDVELTVEER	29	13	3	25.53	2	732.36
					NLLSVAYK	41	8	12	87.47	2	454.268
					DSTLIMQLLR	212	10	11	118.47	2	595.34
sp|P62158|CALM_HUMAN Calmodulin OS=Homo sapiens GN=CALM1 PE=1 SV=2	85.64	3	22.15		EAFSLFDKDGDGTITTK	14	17	8	61.97	3	615.64
					VFDKDGNGYISAAELR	91	16	4	21.82	3	585.631
					EAFSLFDKDGDGTITTK	14	17	3	27.81	3	615.637
sp|P61769|B2MG_HUMAN Beta-2-microglobulin OS=Homo sapiens GN=B2M PE=1 SV=1	180.51	4	40.34	Carbamidomethyl+C(6)	SNFLNCYVSGFHPSDIEVDLLK	39	22	14	82.33	3	852.088
					VNHVTLSQPK	101	10	10	101.19	2	561.823
					VEHSDLSFSK	68	10	5	51.04	2	574.791
					IQVYSR	26	6	3	46.42	2	383.219
sp|P31947|1433S_HUMAN 14-3-3 protein sigma OS=Homo sapiens GN=SFN PE=1 SV=1	122.3	3	16.53		NLLSVAYK	41	8	9	77.43	2	454.269
				Carbamidomethyl+C(9)	VETELQGVCDTVLGLLDSHLIK	87	22	6	41.52	3	813.772
					YLAEVATGDDK	129	11	3	29.73	3	394.526
sp|P04083|ANXA1_HUMAN Annexin A1 OS=Homo sapiens GN=ANXA1 PE=1 SV=2	595.63	18	50.58		ALTGHLEEVVLALLK	98	15	24	255.37	3	535.99
					TPAQFDADELR	113	11	9	115.56	2	631.811
					AAYLQETGKPLDETLKK	81	17	8	49.84	4	477.011
					GGPGSAVSPYPTFNPSSDVAALHK	29	24	6	35.97	3	786.066
					NALLSLAK	177	8	5	46.44	2	415.262
					VLDLELK	250	7	6	61.41	2	415.258
				Carbamidomethyl+C(1)	CATSKPAFFAEK	269	12	7	41.24	3	452.892
					GVDEATIIDILTKR	58	14	5	48.44	3	515.294
					GLGTDEDTLIEILASR	128	16	9	116.84	2	851.958
					GTDVNVFNTILTTR	214	14	13	144.22	2	775.923
					DITSDTSGDFR	166	11	6	82.1	2	607.279
					SYPQLR	228	6	1	15.48	2	382.211
				Carbamidomethyl+C(7)	MYGISLCQAILDETKGDYEK	317	20	4	33.7	3	778.712
					DEATIIDILTKR	60	12	0	2.31	2	694.401
				Carbamidomethyl+C(1)	CATSKPAFF	269	9	0	1.8	2	514.751
					YLQETGKPLDETLKK	83	15	1	7.52	4	441.491
					LQETGKPLDETLKK	84	14	0	3.08	3	533.969
					ALTGHLEEVVLALLK	98	15	0	2.57	3	529.989
sp|P04220|MUCB_HUMAN Ig mu heavy chain disease protein OS=Homo sapiens PE=1 SV=1	202.96	6	26.34	Carbamidomethyl+C(3)	FTCTVTHTDLPSPLK	238	15	7	32.41	3	572.96
					GVALHRPDVYLLPPAR	260	16	5	37.26	3	592.013
					VSVFVPPR	50	8	5	56.98	2	450.771
					VTSTLTIK	115	8	5	46.5	2	431.768
				Carbamidomethyl+C(22)	YFAHSILTVSEEEWNTGETYTCVVAHEALPNR	329	32	5	17.65	4	931.697
					QVGSGVTTDEVEAEAKESGPTTYK	91	24	4	24.73	3	828.406
sp|P04264|K2C1_HUMAN Keratin	319.98	16	31.06		THNLEPYFESFINNLR	223	16	14	84.89	3	665.334
					SLDLDSIIAEVK	343	12	9	53.15	2	651.868
					IEISELNR	395	8	5	46.44	2	487.273
					SLNNQFASFIDK	185	12	6	41.24	2	692.356
					TLLEGEESR	483	9	5	43.69	2	517.267
					SLVNLGGSK	65	9	7	52.9	2	437.757
					FLEQQNQVLQTK	199	12	4	43.16	2	738.405
					WELLQQVDTSTR	211	12	3	27.26	2	738.388
					QISNLQQSISDAEQR	417	15	3	22.68	3	572.959
					TNAENEFVTIK	277	11	5	62.1	2	633.331
					FVSTTYSGVTR	633	11	4	29.43	2	609.304
					LNDLEDALQQAK	443	12	4	44.25	2	679.363
				Carbamidomethyl+C(14)	TLLEGEESRMSGECAPNVSVSVSTSHTTISGGGSR	483	35	7	49.28	4	895.665
					VDQLKSDQSR	241	10	4	48.38	2	588.31
					DYQELMNTKLALDLEIATYR	463	20	4	25.57	3	800.739
					LNDLEDALQQAKEDLAR	443	17	5	27.55	3	648
sp|P04406|G3P_HUMAN Glyceraldehyde-3-phosphate dehydrogenase OS=Homo sapiens GN=GAPDH PE=1 SV=3	143.71	7	37.61		VIHDNFGIVEGLMTTVHAITATQK	162	24	11	94.3	4	649.597
					LVINGNPITIFQERDPSK	66	18	8	45.06	3	681.046
					LISWYDNEFGYSNR	309	14	4	39.81	2	882.42
				Carbamidomethyl+C(13)	VPTANVSVVDLTCR	234	14	4	38.61	2	765.913
				Carbamidomethyl+C(7);Carbamidomethyl+C(11)	IISNASCTTNCLAPLAK	145	17	3	20.82	3	611.982
					VDIVAINDPFIDLNYMVYMFQYDSTHGK	27	28	3	14.52	3	1103.54
					LISWYDNEFGYSNRVVDLMAHMASK	309	25	4	21.9	3	982.802
sp|P05091|ALDH2_HUMAN Aldehyde dehydrogenase	144.14	4	6.38		LADLIER	107	7	6	73.63	2	415.245
					VTLELGGK	281	8	4	46.44	2	408.747
					VPQK	511	4	2	14.97	1	471.296
					EEIFGPVMQILKFK	414	14	3	31.75	3	560.309
sp|P05109|S10A8_HUMAN Protein S100-A8 OS=Homo sapiens GN=S100A8 PE=1 SV=1	208.12	5	45.16		ALNSIIDVYHK	7	11	8	96.52	3	424.903
					GADVWFK	49	7	7	58.83	2	411.714
					GNFHAVYR	23	8	9	62.09	2	482.243
				Carbamidomethyl+C(6)	LLETECPQYIR	36	11	9	98.06	2	711.367
					YSLIK	18	5	1	15.33	1	623.379
sp|P07355|ANXA2_HUMAN Annexin A2 OS=Homo sapiens GN=ANXA2 PE=1 SV=2	446.04	12	48.67		SALSGHLETVILGLLK	88	16	19	199.96	3	550.999
				Carbamidomethyl+C(13)	GDLENAFLNLVQCIQNKPLYFADR	249	24	21	194.76	3	946.822
					TDLEKDIISDTSGDFR	152	16	7	46.61	3	604.633
					LSLEGDHSTPPSAYGSVK	10	18	5	35.61	3	615.645
					GVDEVTIVNILTNR	49	14	6	51.61	2	771.939
					SLYYYIQQDTK	313	11	3	32.74	2	711.361
				Carbamidomethyl+C(14)	GLGTDEDSLIEIICSR	119	16	4	44.14	2	889.449
					WISIMTER	212	8	4	46.76	2	518.276
					AYTNFDAER	28	9	7	86.99	2	543.755
					TNQELQEINR	135	10	7	34.25	2	622.819
					RAEDGSVIDYELIDQDAR	178	18	5	45.06	3	689.006
					SLYYYIQQDTKGDYQK	313	16	4	21.82	3	671.66
sp|P08107|HSP71_HUMAN Heat shock 70 kDa protein 1A/1B OS=Homo sapiens GN=HSPA1A PE=1 SV=5	255.51	7	15.76		HWPFQVINDGDKPK	88	14	4	24.02	3	560.958
					DAGVIAGLNVLR	159	12	5	43.23	2	599.358
					LLQDFFNGR	348	9	5	60.76	2	555.296
					VEIIANDQGNR	25	11	7	81.25	2	614.824
					NALESYAFNMK	539	11	4	32.5	3	429.872
					TTPSYVAFTDTER	36	13	4	25.53	2	744.364
				Carbamidomethyl+C(6)	ELEQVCNPIISGLYQGAGGPGPGGFGAQGPK	597	31	4	18.09	3	1019.18
sp|P08727|K1C19_HUMAN Keratin	263.57	9	21.5		VLDELTLAR	188	9	4	43.69	2	515.305
					FGAQLAHIQALISGIEAQLGDVR	330	23	16	151.75	3	803.117
					LASYLDK	90	7	6	58.4	2	405.225
					FETEQALR	168	8	3	38.66	2	497.254
					ILSDMR	247	6	1	15.48	1	734.386
					EVAGHTEQLQMSR	280	13	4	39.15	2	743.354
					FGPGVAFR	24	8	3	46.44	2	425.739
					ALEAANGELEVK	99	12	3	27.26	3	415.228
				Oxidation+M(6)	SQYEVMAEQNR	253	11	4	29.43	2	685.806
sp|P13645|K1C10_HUMAN Keratin	185.9	4	11.99		LASYLDK	156	7	6	58.4	2	405.225
					NQILNLTTDNANILLQIDNAR	207	21	8	57.05	3	789.767
				Carbamidomethyl+C(2)	YCVQLSQIQAQISALEEQLQQIR	399	23	11	51.42	3	916.153
					SKELTTEIDNNIEQISSYK	343	19	3	28.07	4	553.78
sp|P14618|KPYM_HUMAN Pyruvate kinase isozymes M1/M2 OS=Homo sapiens GN=PKM2 PE=1 SV=4	178.82	13	30.7		TATESFASDPILYRPVAVALDTK	92	23	10	32.01	3	822.44
					EAEAAIYHLQLFEELRR	383	17	7	29.26	3	696.704
					GDLGIEIPAEK	294	11	4	48.71	2	571.315
				Carbamidomethyl+C(7)	GIFPVLCKDPVQEAWAEDVDLR	467	22	4	26.86	3	853.104
					GVNLPGAAVDLPAVSEKDIQDLK	207	23	4	25.48	3	783.766
				Carbamidomethyl+C(7)	GIFPVLCK	467	8	3	41.73	2	467.261
				Carbamidomethyl+C(6)	NTGIICTIGPASR	43	13	7	65.74	2	680.365
					SVETLK	56	6	3	30.75	1	676.389
					TGLIK	120	5	1	15.25	1	531.348
					VVPVP	526	5	1	15.25	1	510.334
					KGDVVIVLTGWRPGSGFTNTMR	504	22	5	33.2	4	598.569
					RFDEILEASDGIMVAR	278	16	4	30.73	3	607.979
					EAEAAIYHLQLFEELRR	383	17	0	3.07	4	518.273
sp|P18669|PGAM1_HUMAN Phosphoglycerate mutase 1 OS=Homo sapiens GN=PGAM1 PE=1 SV=2	88.09	5	23.23		TLWTVLDAIDQMWLPVVR	65	18	7	42.75	3	719.397
					NLKPIKPMQFLGDEETVR	222	18	4	28.65	3	705.719
					GIVK	191	4	1	14.99	1	416.285
					LVLIR	5	5	1	15.25	1	613.445
					ALPFWNEEIVPQIK	162	14	3	24.02	2	842.468
sp|P21980|TGM2_HUMAN Protein-glutamine gamma-glutamyltransferase 2 OS=Homo sapiens GN=TGM2 PE=1 SV=2	309.35	12	21.25	Carbamidomethyl+C(5)	SVPLCILYEK	540	10	6	42.19	2	611.338
					DLYLENPEIK	580	10	7	63.61	2	617.328
					ALLVEPVINSYLLAER	564	16	12	115.53	3	600.678
					GQPFWLTLHFEGR	35	13	10	73.19	3	529.941
					YLLNLNLEPFSEK	527	13	6	70.18	2	790.434
					VVTNYNSAHDQNSNLLIEYFR	296	21	4	17.53	3	833.083
					TVEIPDPVEAGEEVK	634	15	3	28.7	2	806.419
				Carbamidomethyl+C(12)	TVSYNGILGPECGTK	512	15	3	22.68	2	798.4
				Carbamidomethyl+C(1)	CDLELETNGR	9	10	3	42.19	2	603.782
				Carbamidomethyl+C(4)	LLLCAR	506	6	1	15.48	2	373.227
					EDITHTYKYPEGSSEER	436	17	5	44.4	3	680.971
					PFWLTLHFEGR	37	11	1	8.25	3	468.243
sp|P30838|AL3A1_HUMAN Aldehyde dehydrogenase	246.7	10	24.28		LIQEQEQELVGALAADLHK	35	19	14	129.53	3	702.384
					IQQLEALQR	26	9	9	52.8	2	549.823
					FDHILYTGSTGVGK	180	14	7	45.6	3	498.927
					EKPLALYMFSSNDK	358	14	4	39.81	3	548.281
					DYGR	280	4	1	15.08	1	510.234
					LPEWAADEPVEK	77	12	4	39.57	2	692.354
					HLTPVTLELGGK	202	12	9	103.64	2	632.876
					VAYGGTGDAATR	302	12	4	52.3	2	569.786
					VMGLIEGQK	293	9	4	62.34	2	487.776
					IISAR	284	5	2	30.67	1	559.359
